# Supplementary material
Source: PubMed Central journal article supplement (PMC5747315)
Supplement: NIHMS926823-supplement-Link_to_final_version_of_paper.pdf [file NIHMS926823-supplement-Link_to_final_version_of_paper.pdf]

## **Structure of histone-based chromatin in Archaea**

A link to the final version of the paper published in *Science* is included (per *Science* requirement)

<http://science.sciencemag.org/content/357/6351/609.full>
